# Supplementary material for: Rapid Identification of Escherichia coli Colistin-Resistant Strains by MALDI-TOF Mass Spectrometry
Source: MDPI journal article supplement (doi:10.3390/microorganisms9112210), 2021-10-24
Supplement: s1 [file s1]

**Supplementary Table S1:** list of potential discriminating peaks. *t*-test: *p*-value obtained by Student's *t*-test; W-test: *p*-value obtained by Wilcoxon test; Ave: the peak area/intensity average value; colR-Ec: colistin-resistant *E. coli* strains; colS-Ec: colistin-susceptible *E. coli* strains; SD: Standard Deviation.

| Mass  | <i>t</i> -test | W-test     | Ave colR-Ec ± SD | Ave colS-Ec ± SD |
|-------|----------------|------------|------------------|------------------|
| 2181  | < 0.000001     | < 0.000001 | 2.72 ± 1.3       | 5.91 ± 3.24      |
| 2690  | < 0.000001     | 0.00000211 | 7.18 ± 4.04      | 15.26 ± 8.45     |
| 3128  | < 0.000001     | < 0.000001 | 4.3 ± 2.07       | 10.08 ± 5.15     |
| 3158  | < 0.000001     | < 0.000001 | 4.2 ± 2.15       | 9.52 ± 5.16      |
| 3638  | < 0.000001     | < 0.000001 | 8.71 ± 3.2       | 14.46 ± 4.22     |
| 3936  | < 0.000001     | < 0.000001 | 2.2 ± 1.05       | 4.28 ± 1.4       |
| 4177  | < 0.000001     | < 0.000001 | 8.98 ± 3.56      | 3.91 ± 1.69      |
| 4365  | < 0.000001     | < 0.000001 | 9.54 ± 5.78      | 26.55 ± 9.74     |
| 4383  | < 0.000001     | < 0.000001 | 1.93 ± 1.09      | 4.49 ± 1.36      |
| 4440  | < 0.000001     | < 0.000001 | 4.4 ± 1.48       | 9.73 ± 2.19      |
| 4449  | < 0.000001     | < 0.000001 | 4.01 ± 1.33      | 8.27 ± 1.66      |
| 4498  | < 0.000001     | < 0.000001 | 3.86 ± 0.59      | 6.56 ± 2.42      |
| 4534  | < 0.000001     | < 0.000001 | 28.53 ± 18.44    | 3.22 ± 1.81      |
| 4597  | 0.00000326     | 0.00000141 | 4.02 ± 1.06      | 5.57 ± 1.62      |
| 4615  | 0.00038        | 0.00234    | 9.76 ± 3.41      | 7.45 ± 1.66      |
| 4858  | < 0.000001     | < 0.000001 | 46.79 ± 29.29    | 3.4 ± 2.62       |
| 5071  | < 0.000001     | < 0.000001 | 5.98 ± 1.38      | 8.38 ± 2.08      |
| 5098  | 0.000773       | 0.00314    | 11.54 ± 7.74     | 17.79 ± 8.14     |
| 5152  | < 0.000001     | < 0.000001 | 5.63 ± 2.61      | 10.68 ± 3.7      |
| 5238  | < 0.000001     | < 0.000001 | 7.12 ± 4.52      | 1.31 ± 0.46      |
| 5329  | 0.000489       | 0.000863   | 5.95 ± 1.3       | 5 ± 0.97         |
| 5348  | < 0.000001     | < 0.000001 | 5.01 ± 1.45      | 8.23 ± 1.12      |
| 5383  | < 0.000001     | < 0.000001 | 20.72 ± 11.75    | 44.64 ± 14.5     |
| 5462  | 0.00000313     | 0.00000368 | 4.21 ± 2.06      | 2.26 ± 1.17      |
| 5612  | < 0.000001     | < 0.000001 | 6.98 ± 2.27      | 3.76 ± 1.3       |
| 5754  | < 0.000001     | 0.00253    | 8.24 ± 7.16      | 1.49 ± 0.48      |
| 6257  | < 0.000001     | < 0.000001 | 10.58 ± 6.73     | 29.57 ± 8.35     |
| 6283  | < 0.000001     | < 0.000001 | 2.88 ± 1.65      | 7.34 ± 1.47      |
| 6318  | < 0.000001     | < 0.000001 | 7.54 ± 4.64      | 19.84 ± 5.87     |
| 6388  | < 0.000001     | < 0.000001 | 3.04 ± 1.38      | 6.94 ± 1.79      |
| 6413  | < 0.000001     | < 0.000001 | 3.39 ± 1.21      | 9.95 ± 3.69      |
| 6487  | < 0.000001     | < 0.000001 | 2.1 ± 0.98       | 4.46 ± 1.16      |
| 7276  | < 0.000001     | < 0.000001 | 13.04 ± 6.52     | 31.98 ± 7.24     |
| 7301  | < 0.000001     | < 0.000001 | 2.5 ± 0.94       | 5.85 ± 2.11      |
| 7335  | < 0.000001     | < 0.000001 | 2 ± 0.73         | 9.46 ± 6.72      |
| 7872  | < 0.000001     | < 0.000001 | 2.5 ± 1.24       | 4.96 ± 1.06      |
| 8330  | 0.000164       | 0.00847    | 7.3 ± 6.12       | 3.14 ± 0.76      |
| 8352  | 0.00000268     | < 0.000001 | 9.22 ± 5.35      | 4.42 ± 1.44      |
| 8371  | 0.000284       | 0.00112    | 4.84 ± 3.05      | 7.14 ± 2.22      |
| 8856  | < 0.000001     | < 0.000001 | 2.43 ± 0.92      | 4.84 ± 1.31      |
| 8878  | < 0.000001     | < 0.000001 | 3.28 ± 1.09      | 7.72 ± 1.57      |
| 8899  | < 0.000001     | < 0.000001 | 2.65 ± 0.95      | 5.89 ± 1.63      |
| 9066  | < 0.000001     | < 0.000001 | 59.25 ± 28.87    | 5.65 ± 3.81      |
| 9538  | < 0.000001     | < 0.000001 | 15.22 ± 5.55     | 21.91 ± 4.14     |
| 9715  | < 0.000001     | < 0.000001 | 65.24 ± 34.86    | 3.99 ± 3.1       |
| 9740  | < 0.000001     | < 0.000001 | 17.39 ± 5.51     | 3.74 ± 6.12      |
| 10302 | < 0.000001     | < 0.000001 | 1.89 ± 1.24      | 4.8 ± 1.29       |
